## P490

**Time boundaries of three-phase time-sensitive model for ventricular fibrillation cardiac arrest**

Goto Y.<sup>1</sup>; Funada A.<sup>2</sup>; Maeda T.<sup>1</sup>; Okada F.<sup>1</sup>; Goto Y.<sup>3</sup>

<sup>1</sup>Kanazawa University Hospital, Department of Emergency and Critical Care Medicine, Kanazawa, Japan

<sup>2</sup>Osaka Saiseikai Senri Hospital, Department of Cardiology, Osaka, Japan

<sup>3</sup>Yawata Medical Center, Department of Cardiology, Komatsu, Japan

**Funding Acknowledgements:** Japan Society for the Promotion of Science (KAKENHI Grant No. 18K09999)

**Background:** Recent clinical evidence has suggested that the pathophysiology of ventricular fibrillation (VF) cardiac arrest may consist of three time-sensitive phases, namely electrical, circulatory, and metabolic. According to this model of cardiopulmonary resuscitation (CPR), the optimal treatment of cardiac arrest is phase-specific. The potential survival benefit of bystander cardiopulmonary resuscitation (BCPR) depends in part on ischemic time (i.e., the collapse-to-shock interval), with the greatest benefit occurring during the circulatory (second) phase. However, the time boundaries between phases are not precisely defined in the current literature.

**Purpose:** The purpose of the present study was to determine the time boundaries of the three-phase time-sensitive model for VF cardiac arrest.

**Methods:** We reviewed 20,741 adult patients with initial VF after witnessed out-of-hospital cardiac arrest from a presumed cardiac origin who were included in the All-Japan Utstein-style registry from 2013 to 2017. We excluded patients who underwent bystander defibrillation prior to arrival of emergency medical services personnel. The study end point was 1-month neurologically intact survival (Cerebral Performance Category scale 1 or 2). Collapse-to-shock interval was defined as the time from collapse to first shock delivery by emergency medical services personnel. Patients were divided into two groups, BCPR (n = 11,606, 56.0%) and non-BCPR (n = 9135, 44.0%), according to whether they had received BCPR or not.

**Results:** The rate of 1-month neurologically intact survival in the BCPR group was significantly higher than that in the non-BCPR group (27.9% [3237/11,606] vs 17.9% [1632/9135],  $P < 0.0001$ ; adjusted odds ratio [OR], 1.90; 95% confidence interval [CI], 1.75–2.07;  $P < 0.0001$ ). Overall, increased collapse-to-shock interval was associated with significantly decreased adjusted odds of 1-month neurologically intact survival (adjusted OR for each 1-minute increase, 0.94; 95% CI, 0.93–0.95;  $P < 0.0001$ ). In the BCPR group, the ranges of collapse-to-shock interval that were associated with increased adjusted 1-month neurologically intact survival were from 7 minutes (adjusted OR, 1.95; 95% CI, 1.44–2.63;  $P < 0.0001$ ) to 17 minutes (adjusted OR, 2.82; 95% CI, 1.62–4.91;  $P = 0.0002$ ) as compared with those in the non-BCPR group. However, the increase in neurologically intact survival of the BCPR group became statistically insignificant as compared with that of the non-BCPR group when the collapse-to-shock interval was outside these ranges.

**Conclusions:** The above-mentioned findings suggest that the time boundaries of the three-phase time-sensitive model for VF cardiac arrest may be as follows: electrical phase, from collapse to <7 minutes; circulatory phase, from 7 to 17 minutes; and metabolic phase, >17 minutes onward from collapse.
